# Supplementary material for: Phosphorus-doped cobalt sulphide nanocubes as an electrocatalyst for the hydrogen evolution reaction in an alkaline medium
Source: Royal Society of Chemistry journal article supplement (doi:10.1039/d4nj03576c), 2025-01-01
Supplement: d4nj03576c1.pdf [file d4nj03576c1.pdf]

## Phosphorus-Doped Cobalt sulphide Nanocubes as a Efficient Electrocatalyst for Hydrogen evolution Reaction

*P. Krishnamurthy, T. Maiyalagan\**

*Electrochemical Energy Laboratory, Department of Chemistry,*

*SRM Institute of Science and Technology, Kattankulathur - 603 203, Tamil Nadu, India*

*\*e-mail address- [maiyalat@srmist.edu.in](mailto:maiyalat@srmist.edu.in)*

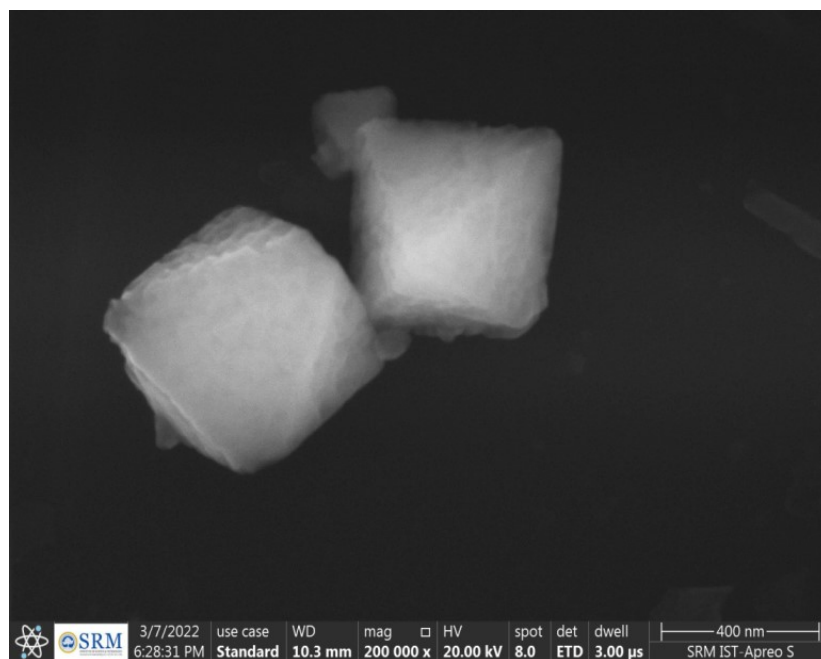

**Fig. S1** SEM image of CoS<sub>2</sub>.

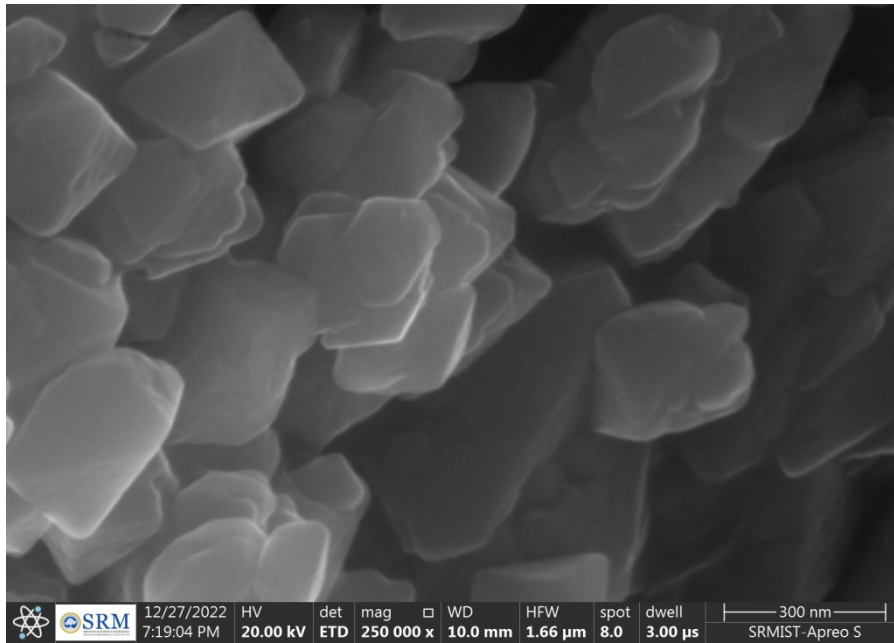

**Fig. S2** SEM image of P doped CoS<sub>2</sub>-1.

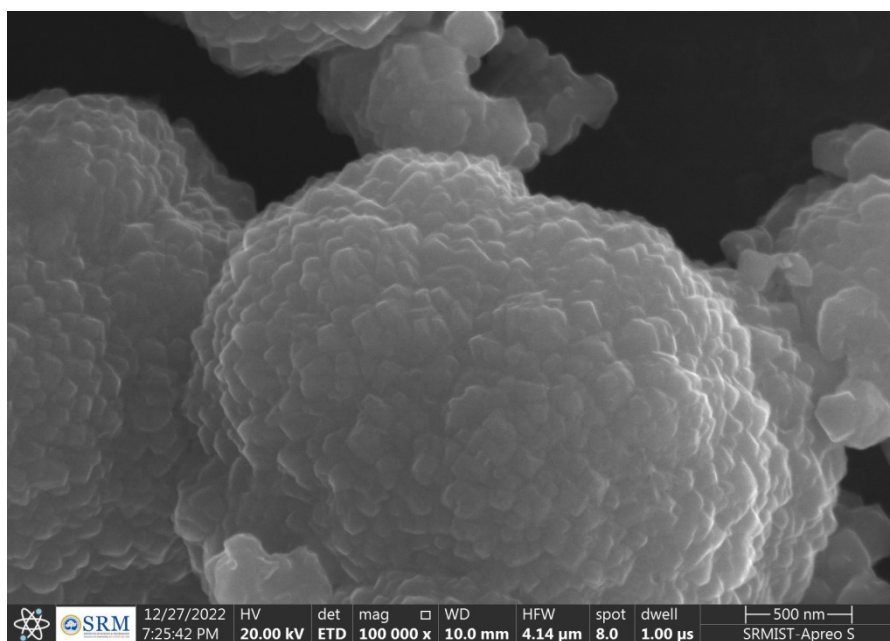

**Fig. S3** SEM image of P doped CoS<sub>2</sub>-3

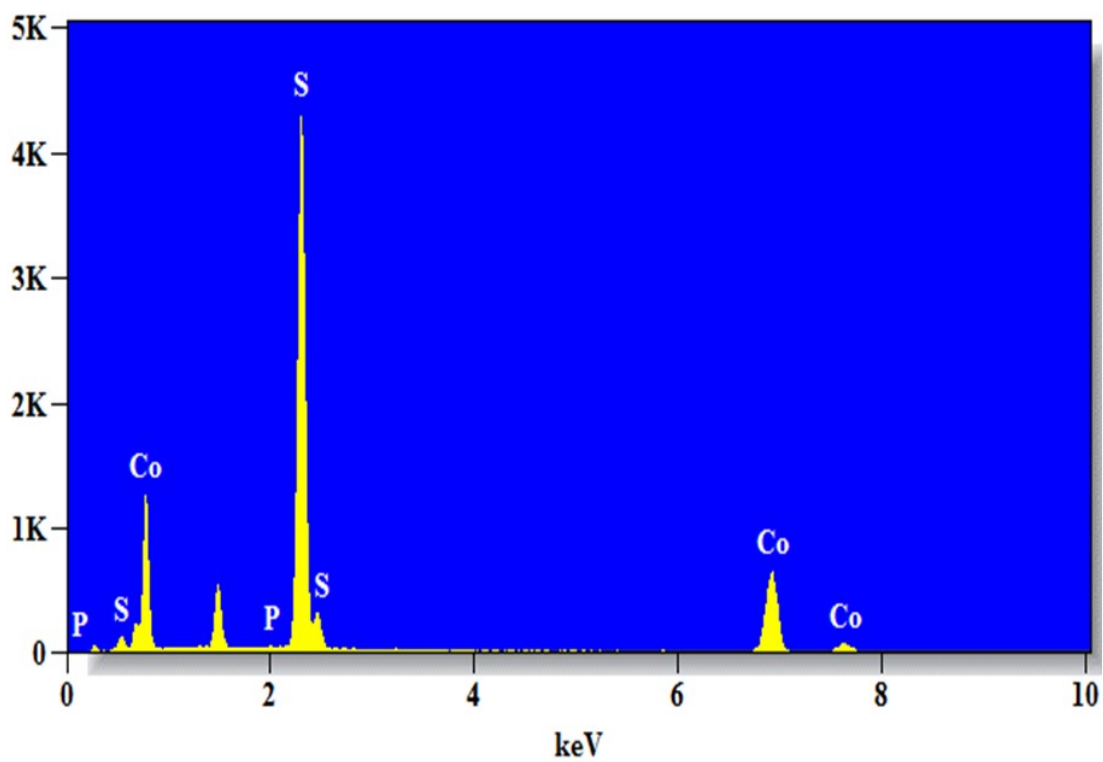

| Element      | Net Counts | Weight % | Atom % | Formula |
|--------------|------------|----------|--------|---------|
| P            | 169        | 0.20     | 0.26   | P       |
| S            | 47683      | 53.97    | 68.22  | S       |
| Co           | 10510      | 45.83    | 31.52  | Co      |
| <b>Total</b> |            | 100.00   | 100.00 |         |

**Fig. S4** EDX spectrum of P doped CoS<sub>2</sub>-1

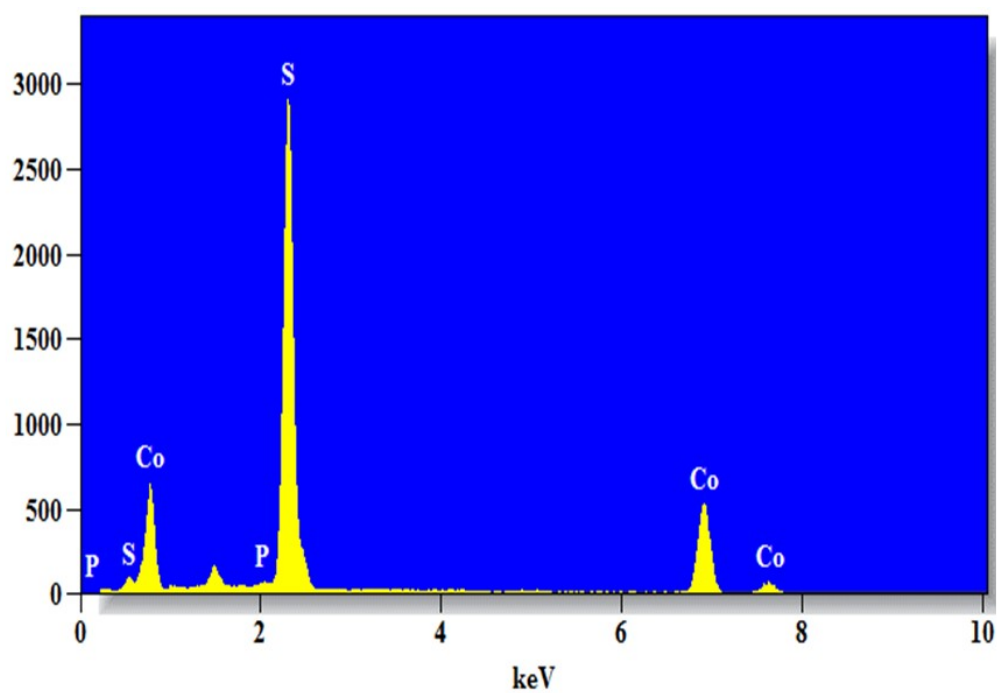

| Element      | Net Counts | Weight % | Atom % | Formula |
|--------------|------------|----------|--------|---------|
| P            | 267        | 0.33     | 0.44   | P       |
| S            | 43001      | 49.30    | 63.99  | S       |
| Co           | 11692      | 50.37    | 35.57  | Co      |
| <b>Total</b> |            | 100.00   | 100.00 |         |

**Fig. S5** EDX spectrum of P doped CoS<sub>2</sub>-2

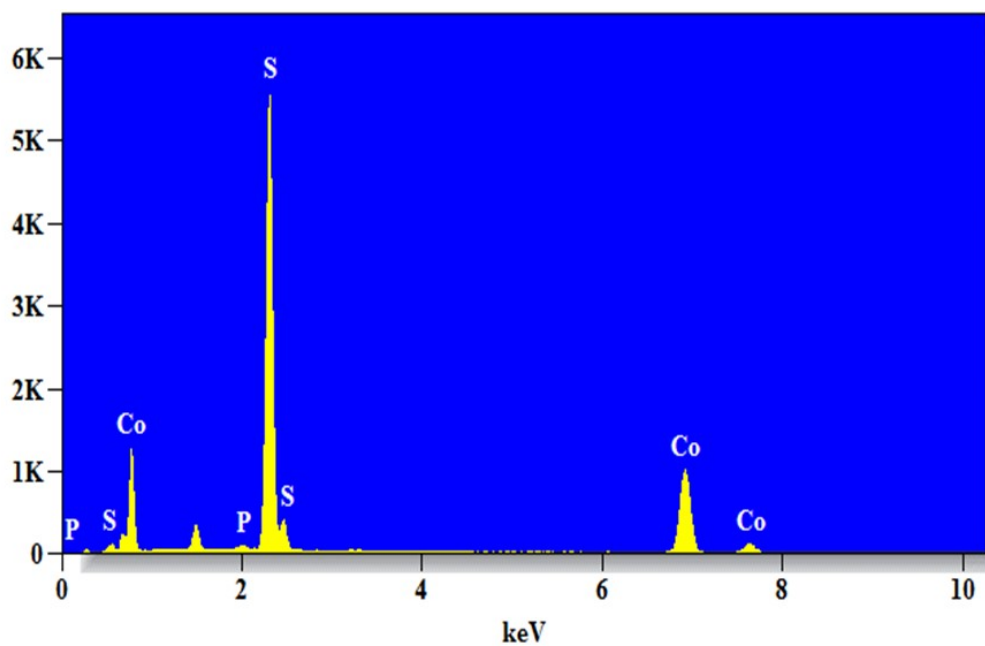

| Element | Net Counts | Weight % | Atom % | Formula |
|---------|------------|----------|--------|---------|
| P       | 766        | 0.65     | 0.86   | P       |
| S       | 62834      | 49.81    | 64.33  | S       |
| Co      | 16609      | 49.54    | 34.81  | Co      |
| Total   |            | 100.00   | 100.00 |         |

**Fig. S6** EDX spectrum of P doped CoS<sub>2-3</sub>

**Table S1** The electrocatalytic HER performance of synthesized P-doped CoS<sub>2</sub>-2 with other recently reported cobalt sulphide-based electrocatalysts in 1M KOH electrolyte.

| <b>Catalyst</b>                                      | <b>Overpotential (mV) at<br/>J=10mA cm<sup>2</sup></b> | <b>Tafel slope<br/>(mV/dec)</b> | <b>Reference</b> |
|------------------------------------------------------|--------------------------------------------------------|---------------------------------|------------------|
| P doped CoS <sub>2</sub> /NF                         | 138                                                    | 96.2                            | <b>This work</b> |
| Mo-CoS <sub>2</sub> /NC                              | 158                                                    | 123                             | 40               |
| CoS <sub>2</sub> @NHCs-800                           | 118                                                    | 74                              | 41               |
| Sn-CoS <sub>2</sub> /CC                              | 132                                                    | 179.9                           | 42               |
| CoS <sub>2</sub> @N-ASC@NF                           | 165.6                                                  | 67.8                            | 43               |
| Co/CoS <sub>2</sub> @NC                              | 188                                                    | -                               | 44               |
| CoS <sub>2</sub> NTA/CC                              | 193                                                    | 88                              | 45               |
| CoS <sub>2</sub> @WS <sub>2</sub> /NF                | 127                                                    | 177                             | 46               |
| CoS <sub>1.25</sub> Se <sub>0.75</sub> @NC           | 134                                                    | 86                              | 47               |
| CoS <sub>x</sub> /Ni <sub>3</sub> S <sub>2</sub> @NF | 201                                                    | 113.13                          | 48               |

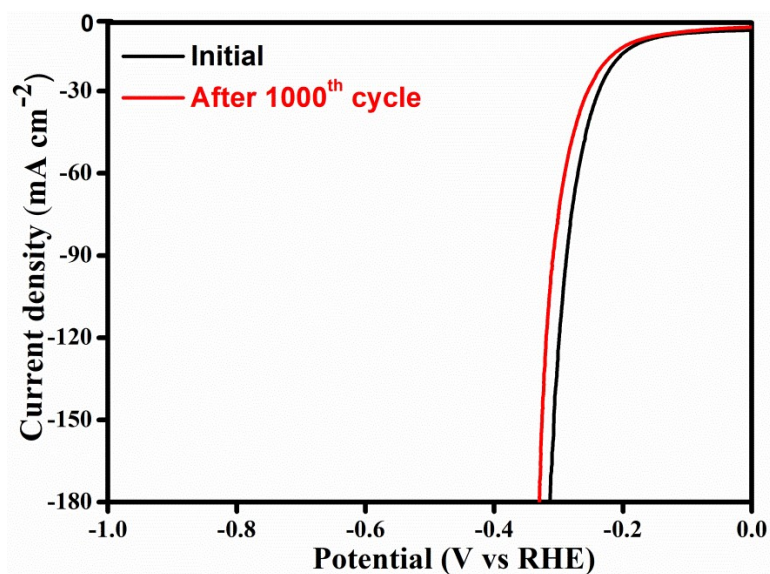

**Fig. S7** Polarization curves of P doped CoS<sub>2</sub>-2 initially and after 1000 cycles CV with a scan rate of 100 mV s<sup>-1</sup> in 1M KOH.



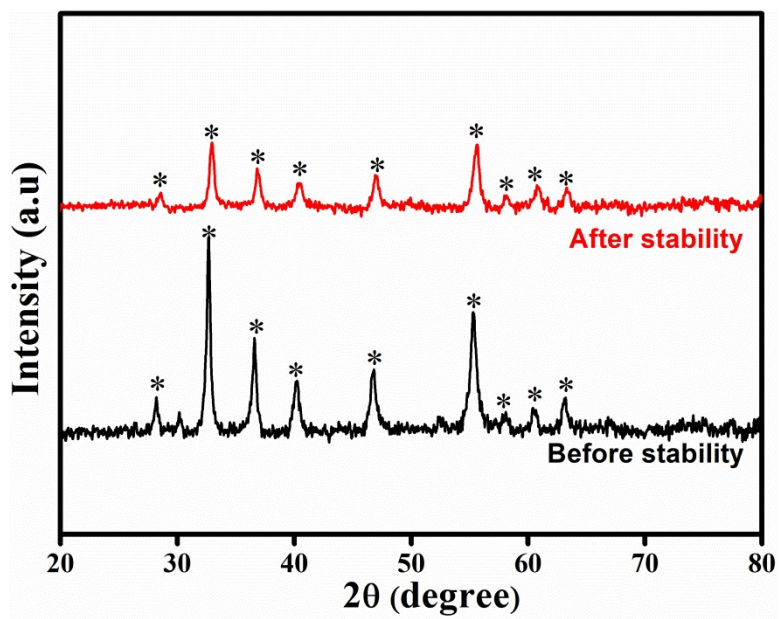

**Fig. S8** XRD analysis of P doped CoS<sub>2</sub>-2 initially and after 1000 cycles.

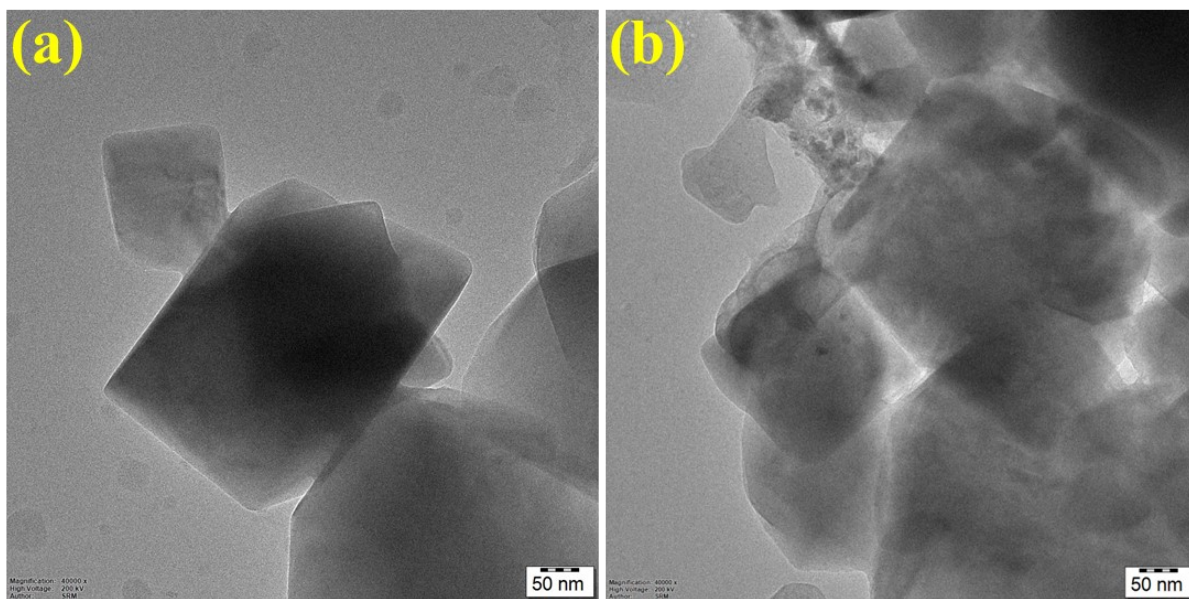

**Fig. S9** TEM image of post HER studies for P doped CoS<sub>2</sub>-2

**Section S1.** Calculation of the Electrochemical Active Surface Area (ECSA)

The prepared electrocatalysts double layer capacitance ( $C_{dl}$ ) values were determined from the cyclic voltammetry (CV) curves recorded (non-faradaic region) at different scan rates. The ECSA of the prepared catalysts was calculated according to equation (1).

$$C_{dl} = \frac{\text{Cathodic} - \text{Anodic}}{2} \text{ ----- (1)}$$

$$\text{ECSA} = \frac{C_{dl}}{C_s} \text{ ----- (2)}$$

The catalyst's  $C_{dl}$  values were derived from the slope of linearly fitted curves by plotting capacitive current density versus scan rate. Where  $C_s$  - is the specific capacitance ( $0.040 \text{ mF cm}^{-2}$ ) and  $C_{dl}$  - is the double-layer capacitance [1].

**Section S2.** Calculate of the TOF of the electrocatalysts, Equations (2) and (3) were used.

$$n = \frac{m_{mass}}{M} \text{ ----- (3)}$$

$$\text{TOF} = \frac{J \times A}{2 \times F \times n} \text{ ----- (4)}$$

Where  $n$  is the number of moles of the active sites on the electrode,  $m_{mass}$  - is mass loading of active materials and  $M$  - is molar mass of active materials, respectively.  $J$  is the current density at overpotential of 250 mV in  $\text{A cm}^{-2}$ , and  $F$  is the Faraday constant ( $96485 \text{ C mol}^{-1}$ ), [2-4].

**Table S2.** Represents the intrinsic catalytic activity of the electrochemical HER performance of P doped  $\text{CoS}_2$ -2, P doped  $\text{CoS}_2$ -3, P doped  $\text{CoS}_2$ -1 and bare  $\text{CoS}_2$  electrocatalysts in 1M KOH electrolyte.

| Catalyst                  | $C_{dl}$<br>( $\text{mF cm}^{-2}$ ) | ECSA<br>( $\text{cm}^2$ ) | TOF @ $\eta=250 \text{ mV}$<br>( $\text{S}^{-1}$ ) |
|---------------------------|-------------------------------------|---------------------------|----------------------------------------------------|
| P doped $\text{CoS}_2$ -2 | 5.44                                | 136                       | 2.43                                               |
| P doped $\text{CoS}_2$ -3 | 3.62                                | 90.5                      | 1.88                                               |

|                             |      |       |      |
|-----------------------------|------|-------|------|
| P doped CoS <sub>2</sub> -1 | 3.47 | 86.75 | 1.18 |
| Bare CoS <sub>2</sub>       | 3.26 | 81.5  | 1.03 |

## Reference

1. Zhou, Z.; Wei, L., Wang, Y., Karahan, H., Chen, Z., Lei, Y., Chen, X., Zhai, S., Liao, X., Chen, Y. Hydrogen evolution reaction activity of nickel phosphide is highly sensitive to electrolyte pH. *J. Mater. Chem. A* 2017, 5, 2039020397.
2. Chen, J., Zhao, G., Chen, Y., Rui, K., Mao, H., Dou, S. X., & Sun, W. (2019). Iron-doped nickel molybdate with enhanced oxygen evolution kinetics. *Chemistry—A European Journal*, 25(1), 280-284.
3. Babar, P., Patil, K., Mahmood, J., Kim, S. J., Kim, J. H., & Yavuz, C. T. (2022). Low-overpotential overall water splitting by a cooperative interface of cobalt-iron hydroxide and iron oxyhydroxide. *Cell Reports Physical Science*, 3(2).
4. Liu, H., Yan, Z., Chen, X., Li, J., Zhang, L., Liu, F., & Cheng, F. (2020). Electrodeposition of Pt-decorated Ni(OH)<sub>2</sub>/CeO<sub>2</sub> hybrid as superior bifunctional electrocatalyst for water splitting. *Research*.
